# Supplementary material for: Prevalence of Chronic Metoclopramide Use and Associated Diagnoses in the US Pediatric Population
Source: PubMed Central journal article supplement — Paediatr Drugs. 2015 May 27;17(4):331–7. doi: 10.1007/s40272-015-0136-2 (PMC4516863; doi:10.1007/s40272-015-0136-2), 2015-05-27
Supplement: 40272_2015_136_MOESM3_ESM.pdf [file 40272_2015_136_MOESM3_ESM.pdf]

Prevalence of Chronic Metoclopramide Use and Associated Diagnoses in the US Pediatric Population  
 Pediatric Drugs

Rachel B. Weinstein PhD<sup>1</sup>, Daniel Fife MD<sup>1</sup>, Sheldon Sloan MD<sup>2</sup>, Erica A. Voss MPH<sup>1</sup>, William Treem MD<sup>3</sup>

<sup>1</sup>Epidemiology, Janssen Research and Development LLC

<sup>2</sup>Global Medical Affairs, Janssen Research and Development LLC

<sup>3</sup>Global Medical Organization - Child Health Innovation and Leadership Department (CHILD), Janssen Research and Development, LLC

Corresponding Author:

Rachel Weinstein, Ph.D.

Email: rweinst1@its.jnj.com

Table A3. Number privately and publically insured based on percent of pediatric population in Medicaid, 2008

| Age group    | National pop counts | % Medicaid   | Privately Insured | Medicaid  |
|--------------|---------------------|--------------|-------------------|-----------|
| < 1 year old | 4132735             | 0.5845213884 | 1,717,063         | 2,415,672 |
| 1 year old   | 4100756             | 0.5033921319 | 2,036,468         | 2,064,288 |
| 2 years old  | 4004146             | 0.5033921319 | 1,988,490         | 2,015,656 |
| 3 years old  | 3992320             | 0.5033921319 | 1,982,618         | 2,009,702 |
| 4 years old  | 4041170             | 0.5033921319 | 2,006,877         | 2,034,293 |
| 5 years old  | 4024297             | 0.5033921319 | 1,998,498         | 2,025,799 |
| 6 years old  | 3988117             | 0.3605754975 | 2,550,100         | 1,438,017 |
| 7 years old  | 4073291             | 0.3605754975 | 2,604,562         | 1,468,729 |
| 8 years old  | 3930544             | 0.3605754975 | 2,513,286         | 1,417,258 |
| 9 years old  | 3913353             | 0.3605754975 | 2,502,294         | 1,411,059 |
| 10 years old | 4093680             | 0.3605754975 | 2,617,599         | 1,476,081 |
| 11 years old | 4055388             | 0.3605754975 | 2,593,114         | 1,462,274 |
| 12 years old | 4159477             | 0.3605754975 | 2,659,672         | 1,499,805 |
| 13 years old | 4200016             | 0.3004135454 | 2,938,274         | 1,261,742 |
| 14 years old | 4198094             | 0.3004135454 | 2,936,930         | 1,261,164 |
| 15 years old | 4318982             | 0.2978032864 | 3,032,775         | 1,286,207 |
| 16 years old | 4411176             | 0.2978032864 | 3,097,513         | 1,313,663 |
| 17 years old | 4467060             | 0.2978032864 | 3,136,755         | 1,330,305 |
