# Supplementary material for: Prevalence of Chronic Metoclopramide Use and Associated Diagnoses in the US Pediatric Population
Source: Springer Nature journal article supplement (doi:10.1007/s40272-015-0136-2), 2015-05-26
Supplement: MOESM1 [file 24128194]

Prevalence of Chronic Metoclopramide Use and Associated Diagnoses in the US Pediatric Population  
Pediatric Drugs

Rachel B. Weinstein PhD<sup>1</sup>, Daniel Fife MD<sup>1</sup>, Sheldon Sloan MD<sup>2</sup>, Erica A. Voss MPH<sup>1</sup>, William Treem MD<sup>3</sup>

<sup>1</sup>Epidemiology, Janssen Research and Development LLC

<sup>2</sup>Global Medical Affairs, Janssen Research and Development LLC

<sup>3</sup>Global Medical Organization - Child Health Innovation and Leadership Department (CHILD)

Janssen Research and Development, LLC

Corresponding Author:

Rachel Weinstein, Ph.D.

Email: rweinst1@its.jnj.com

**Table A1. Definitions of Conditions and Prescriptions**

| Condition or Drug  | Definition                                                                                                                                                                                                                                                                                                                                                                                                                                                                                                                                                                                                                                                                                                                                                                                                                                                                                                                                                                                                                                                                                                                                                                                                                                                                                                                                                                                                                                                                                                                                                                                                                                                                                                                                                                                                                                                                                                                                                                                                                                                                                                                                                                                                                                                                                                                                                                                                                                                                                                                                                                                                                                                                                                                                                                                                                                                                                                                                                                                                                                                                                                                                                                                                                                                                                                                                                                                                                                                                                                                                                                                                                                                                                                                                                                                                                                                                                                                                                                                                                                                                                                                             |
|--------------------|----------------------------------------------------------------------------------------------------------------------------------------------------------------------------------------------------------------------------------------------------------------------------------------------------------------------------------------------------------------------------------------------------------------------------------------------------------------------------------------------------------------------------------------------------------------------------------------------------------------------------------------------------------------------------------------------------------------------------------------------------------------------------------------------------------------------------------------------------------------------------------------------------------------------------------------------------------------------------------------------------------------------------------------------------------------------------------------------------------------------------------------------------------------------------------------------------------------------------------------------------------------------------------------------------------------------------------------------------------------------------------------------------------------------------------------------------------------------------------------------------------------------------------------------------------------------------------------------------------------------------------------------------------------------------------------------------------------------------------------------------------------------------------------------------------------------------------------------------------------------------------------------------------------------------------------------------------------------------------------------------------------------------------------------------------------------------------------------------------------------------------------------------------------------------------------------------------------------------------------------------------------------------------------------------------------------------------------------------------------------------------------------------------------------------------------------------------------------------------------------------------------------------------------------------------------------------------------------------------------------------------------------------------------------------------------------------------------------------------------------------------------------------------------------------------------------------------------------------------------------------------------------------------------------------------------------------------------------------------------------------------------------------------------------------------------------------------------------------------------------------------------------------------------------------------------------------------------------------------------------------------------------------------------------------------------------------------------------------------------------------------------------------------------------------------------------------------------------------------------------------------------------------------------------------------------------------------------------------------------------------------------------------------------------------------------------------------------------------------------------------------------------------------------------------------------------------------------------------------------------------------------------------------------------------------------------------------------------------------------------------------------------------------------------------------------------------------------------------------------------------------------|
| Metoclopramide     | <i>Ingredients:</i><br>Metoclopramide<br>(excluding dose forms: 'injectable solution', 'prefilled syringe', or 'injectable')                                                                                                                                                                                                                                                                                                                                                                                                                                                                                                                                                                                                                                                                                                                                                                                                                                                                                                                                                                                                                                                                                                                                                                                                                                                                                                                                                                                                                                                                                                                                                                                                                                                                                                                                                                                                                                                                                                                                                                                                                                                                                                                                                                                                                                                                                                                                                                                                                                                                                                                                                                                                                                                                                                                                                                                                                                                                                                                                                                                                                                                                                                                                                                                                                                                                                                                                                                                                                                                                                                                                                                                                                                                                                                                                                                                                                                                                                                                                                                                                           |
| GI Diagnoses       | <i>ICD9 Diagnosis Codes:</i><br>536.3-Gastroparesis, 756.73-Gastroschisis, 277.87-Disorder of mitochondrial metabolism, 279.5-Graft-versus-host disease, 279.50-Graft-versus-host disease, unspecified, 279.52-Chronic graft-versus-host disease, 279.53-Acute on chronic graft-versus-host disease, 282.6-Sickle-cell disease, 282.60-Sickle-cell disease, unspecified, 282.61-Hb-SS disease without crisis, 282.62-Hb-S disease with mention of crisis, 359.1-Hereditary progressive muscular dystrophy, 555.0-Regional enteritis of small intestine, 555.2-Regional enteritis of small intestine with large intestine, 558.4-Eosinophilic gastroenteritis and colitis, 558.41-Eosinophilic gastroenteritis, 751.1-Atresia and stenosis of small intestine, congenital, 751.5-Other congenital anomalies of intestine, 756.83-Ehlers-Danlos syndrome, 760.71-Alcohol affecting fetus or newborn via placenta or breast milk, 909.2-Late effect of radiation, 579.3-Other and unspecified postsurgical nonabsorption, 536.8-Dyspepsia and other specified disorders of function of stomach, 787.01-Nausea with vomiting, 787.03-Vomiting alone, 789.06-Abdominal pain, epigastric, 493-Asthma, 493.9-Asthma unspecified, 493.92-Asthma, unspecified with (acute) exacerbation, 496-Chronic airway obstruction, not elsewhere classified, 786.5-Chest pain, 277.00-Cystic fibrosis without mention of meconium ileus, 277.02-Cystic fibrosis with pulmonary manifestations, 486-Pneumonia, organism unspecified, 507.1-Pneumonitis due to inhalation of oils and essences, 507.8-Pneumonitis due to other solids and liquids, 507.0-Pneumonitis due to inhalation of food or vomitus, 473.8-Other chronic sinusitis                                                                                                                                                                                                                                                                                                                                                                                                                                                                                                                                                                                                                                                                                                                                                                                                                                                                                                                                                                                                                                                                                                                                                                                                                                                                                                                                                                                                                                                                                                                                                                                                                                                                                                                                                                                                                                                                                                                                                                                                                                                                                                                                                                                                                                                                                                                                                                                                                    |
| Neuro-GI Disorders | <i>ICD9 Diagnosis Codes:</i><br>046.0-Kuru, 046.1-Jakob-Creutzfeldt disease, 046.11-Variant Creutzfeldt-Jakob disease, 046.19-Other and unspecified Creutzfeldt-Jakob disease, 046.71-Gerstmann-Straussler-Scheinker syndrome, 046.72-Fatal familial insomnia, 046.79-Other and unspecified prion disease of central nervous system, 330-Cerebral degenerations usually manifest in childhood, 330.2-Cerebral degeneration in generalized lipidoses, 330.3-Cerebral degeneration of childhood in other diseases classified elsewhere, 330.8-Other specified cerebral degenerations in childhood, 330.9-Unspecified cerebral degeneration in childhood, 331-Other cerebral degenerations, 331.0-Alzheimer's disease, 331.1-Frontotemporal dementia, 331.11-Pick's disease, 331.19-Other frontotemporal dementia, 331.2-Senile degeneration of brain, 331.7-Cerebral degeneration in diseases classified elsewhere, 331.8-Other cerebral degeneration, 331.89-Other cerebral degeneration, 331.9-Cerebral degeneration, unspecified, 333.71-Athetoid cerebral palsy, 334.0-Friedreich's ataxia, 334.1-Hereditary spastic paraplegia, 334.2-Primary cerebellar degeneration, 334.3-Other cerebellar ataxia, 334.4-Cerebellar ataxia in diseases classified elsewhere, 343-Infantile cerebral palsy, 343.0-Diplegic infantile cerebral palsy, 343.1-Hemiplegic infantile cerebral palsy, 343.2-Quadriplegic infantile cerebral palsy, 343.3-Monoplegic infantile cerebral palsy, 343.4-Infantile hemiplegia, 343.8-Other specified infantile cerebral palsy, 343.9-Infantile cerebral palsy, unspecified, 742.3-Congenital hydrocephalus, 759.5-Tuberous sclerosis, 270.1-Phenylketonuria [PKU], 299-Pervasive developmental disorders, 299.0-Autistic disorder, 299.00-Autistic disorder, current or active state, 299.01-Autistic disorder, residual state, 299.1-Childhood disintegrative disorder, 299.10-Childhood disintegrative disorder, current or active state, 299.11-Childhood disintegrative disorder, residual state, 315-Specific delays in development, 315.3-Developmental speech or language disorder, 315.4-Developmental coordination disorder, 315.8-Other specified delays in development, 315.9-Unspecified delay in development, 317-Mild mental retardation, 318-Other specified mental retardation, 318.0-Moderate mental retardation, 318.1-Severe mental retardation, 318.2-Profound mental retardation, 319-Unspecified mental retardation, 438.0-Cognitive deficits as late effect of cerebrovascular disease, 438.11-Aphasia as late effect of cerebrovascular disease, 438.81-Apraxia as late effect of cerebrovascular disease, 758.0-Down's syndrome, 758.2-Edwards' syndrome, 758.31-Cri-du-chat syndrome, 758.32-Velo-cardio-facial syndrome, 759.81-Prader-Willi syndrome, 759.83-Fragile X syndrome, 783.41-Failure to thrive, 260-Kwashiorkor, 261-Nutritional marasmus, 262-Other severe protein-calorie malnutrition, 263.0-Malnutrition of moderate degree, 263.8-Other protein-calorie malnutrition, 263.9-Unspecified protein-calorie malnutrition, 307.52-Pica, 764.2-Fetal malnutrition without mention of "light-for-dates", 764.20-Fetal malnutrition without mention of 'light-for-dates', unspecified [weight], 764.21-Fetal malnutrition without mention of 'light-for-dates', less than 500 grams, 764.22-Fetal malnutrition without mention of 'light-for-dates', 500-749 grams, 764.23-Fetal malnutrition without mention of 'light-for-dates', 750-999 grams, 764.24-Fetal malnutrition without mention of 'light-for-dates', 1,000- 1,249 grams, 764.25-Fetal malnutrition without mention of 'light-for-dates', 1,250- 1,499 grams, 764.26-Fetal malnutrition without mention of 'light-for-dates', 1, 500- 1, 749 grams, 764.27-Fetal malnutrition without mention of 'light-for-dates', 1,750- 1,999 grams, 764.28-Fetal malnutrition without mention of 'light-for-dates', 2,000- 2,499 grams, 764.29-Fetal malnutrition without mention of 'light-for-dates', 2, 500+ grams, 779.3-Feeding problems in newborn, 783.1-Abnormal weight gain, 783.2-Abnormal loss of weight and |

underweight, 783.21-Loss of weight, 783.22-Underweight, 783.41-Failure to thrive, 799.4-Cachexia, 327.59-Other organic sleep related movement disorders, 333-Other extrapyramidal disease and abnormal movement disorders, 333.6-Genetic torsion dystonia, 333.71-Athetoid cerebral palsy, 333.83-Spasmodic torticollis, 333.9-Other and unspecified extrapyramidal diseases and abnormal movement disorders, 335.23-Pseudobulbar palsy, 342-Hemiplegia and hemiparesis, 342.0-Flaccid hemiplegia, 342.00-Flaccid hemiplegia, affecting unspecified side, 342.01-Flaccid hemiplegia, affecting dominant side, 342.02-Flaccid hemiplegia, affecting nondominant side, 342.1-Spastic hemiplegia, 342.10-Spastic hemiplegia, affecting unspecified side, 342.11-Spastic hemiplegia, affecting dominant side, 342.12-Spastic hemiplegia, affecting nondominant side, 342.8-Other specified hemiplegia, 342.80-Other specified hemiplegia, affecting unspecified side, 342.81-Other specified hemiplegia, affecting dominant side, 342.82-Other specified hemiplegia, affecting nondominant side, 342.9-Hemiplegia, unspecified, 342.90-Hemiplegia, unspecified, affecting unspecified side, 342.91-Hemiplegia, unspecified, affecting dominant side, 342.92-Hemiplegia, unspecified, affecting nondominant side, 344-Other paralytic syndromes, 344.0-Quadriplegia and quadriplegia, 344.00-Quadriplegia, unspecified, 344.01-C(1)-C(4) quadriplegia and quadriplegia, complete, 344.02-C(1)-C(4) quadriplegia and quadriplegia, incomplete, 344.03-C(5)-C(7) quadriplegia and quadriplegia, complete, 344.04-C(5)-C(7) quadriplegia and quadriplegia, incomplete, 344.09-Other quadriplegia and quadriplegia, 344.1-Paraplegia, 344.2-Diplegia of upper limbs, 344.3-Monoplegia of lower limb, 344.30-Monoplegia of lower limb affecting unspecified side, 344.31-Monoplegia of lower limb affecting dominant side, 344.32-Affecting nondominant side, 344.4-Monoplegia of upper limb, 344.40-Monoplegia of upper limb affecting unspecified side, 344.41-Monoplegia of upper limb affecting dominant side, 344.42-Monoplegia of upper limb affecting nondominant side, 344.5-Unspecified monoplegia, 344.8-Other specified paralytic syndromes, 344.89-Other specified paralytic syndrome, 344.9-Paralysis, unspecified, 438.2-Hemiplegia/hemiparesis as late effect of cerebrovascular disease, 438.20-Hemiplegia affecting unspecified side as late effect of cerebrovascular disease, 438.21-Hemiplegia affecting dominant side as late effect of cerebrovascular disease, 438.22-Hemiplegia affecting nondominant side as late effect of cerebrovascular disease, 438.3-Monoplegia of upper limb as late effect of cerebrovascular disease, 438.30-Monoplegia of upper limb affecting unspecified side as late effect of cerebrovascular disease, 438.31-Monoplegia of upper limb affecting dominant side as late effect of cerebrovascular disease, 438.32-Monoplegia of upper limb affecting nondominant side as late effect of cerebrovascular disease, 438.4-Monoplegia of lower limb as late effect of cerebrovascular disease, 438.40-Monoplegia of lower limb affecting unspecified side as late effect of cerebrovascular disease, 438.41-Monoplegia of lower limb affecting dominant side as late effect of cerebrovascular disease, 438.42-Monoplegia of lower limb affecting nondominant side as late effect of cerebrovascular disease, 438.5-Other paralytic syndrome as late effect of cerebrovascular disease, 438.50-Other paralytic syndrome affecting unspecified side as late effect of cerebrovascular disease, 438.51-Other paralytic syndrome affecting dominant side as late effect of cerebrovascular disease, 438.52-Other paralytic syndrome affecting nondominant side as late effect of cerebrovascular disease, 438.53-Other paralytic syndrome, bilateral, 530.5-Dyskinesia of esophagus, 723.5-Torticollis, unspecified, 780.72-Functional quadriplegia, 345-Epilepsy and recurrent seizures, 345.0-Generalized nonconvulsive epilepsy, 345.00-Generalized nonconvulsive epilepsy, without mention of intractable epilepsy, 345.01-Generalized nonconvulsive epilepsy, with intractable epilepsy, 345.1-Generalized convulsive epilepsy, 345.10-Generalized convulsive epilepsy, without mention of intractable epilepsy, 345.11-Generalized convulsive epilepsy, with intractable epilepsy, 345.2-Petit mal status, epileptic, 345.3-Grand mal status, epileptic, 345.4-Localization-related (focal) (partial) epilepsy and epileptic syndromes with complex partial seizures, 345.40-Localization-related (focal) (partial) epilepsy and epileptic syndromes with complex partial seizures, without mention of intractable epilepsy, 345.41-Localization-related (focal) (partial) epilepsy and epileptic syndromes with complex partial seizures, with intractable epilepsy, 345.5-Localization-related (focal) (partial) epilepsy and epileptic syndromes with simple partial seizures, 345.50-Localization-related (focal) (partial) epilepsy and epileptic syndromes with simple partial seizures, without mention of intractable epilepsy, 345.51-Localization-related (focal) (partial) epilepsy and epileptic syndromes with simple partial seizures, with intractable epilepsy, 345.6-Infantile spasms, 345.60-Infantile spasms, without mention of intractable epilepsy, 345.61-Infantile spasms, with intractable epilepsy, 345.7-Epilepsia partialis continua, 345.70-Epilepsia partialis continua, without mention of intractable epilepsy, 345.71-Epilepsia partialis continua, with intractable epilepsy, 345.8-Other forms of epilepsy and recurrent seizures, 345.80-Other forms of epilepsy and recurrent seizures, without mention of intractable epilepsy, 345.81-Other forms of epilepsy and recurrent seizures, with intractable epilepsy, 345.9-Epilepsy unspecified, 345.90-Epilepsy, unspecified, without mention of intractable epilepsy, 345.91-Epilepsy, unspecified, with intractable epilepsy, 649.4-Epilepsy complicating pregnancy, childbirth, or the puerperium, 649.40-Epilepsy complicating pregnancy, childbirth, or the puerperium, unspecified as to episode of care or not applicable, 649.41-Epilepsy complicating pregnancy, childbirth, or the puerperium, delivered, with or without mention of antepartum condition, 649.42-Epilepsy complicating pregnancy, childbirth, or the puerperium, delivered, with mention of postpartum complication, 649.43-Epilepsy complicating pregnancy, childbirth, or the puerperium, antepartum condition or complication, 649.44-Epilepsy complicating pregnancy, childbirth, or the puerperium, postpartum condition or complication, 779.0-Convulsions in newborn, 780.3-Convulsions, 780.39-Other convulsions

GERD

*ICD9 Diagnosis Codes:*

530.81-Esophageal reflux, 530.11-Reflux esophagitis
