# Supplementary material for: Prevalence of Chronic Metoclopramide Use and Associated Diagnoses in the US Pediatric Population
Source: Springer Nature journal article supplement (doi:10.1007/s40272-015-0136-2), 2015-05-26
Supplement: MOESM2 [file 24128194]

Prevalence of Chronic Metoclopramide Use and Associated Diagnoses in the US Pediatric Population  
Pediatric Drugs

Rachel B. Weinstein PhD<sup>1</sup>, Daniel Fife MD<sup>1</sup>, Sheldon Sloan MD<sup>2</sup>, Erica A. Voss MPH<sup>1</sup>, William Treem MD<sup>3</sup>

<sup>1</sup>Epidemiology, Janssen Research and Development LLC

<sup>2</sup>Global Medical Affairs, Janssen Research and Development LLC

<sup>3</sup>Global Medical Organization - Child Health Innovation and Leadership Department (CHILD), Janssen Research and Development, LLC

Corresponding Author:

Rachel Weinstein, Ph.D.

Email: rweinst1@its.jnj.com

**Table A2. Percent of National Pediatric population covered by Medicaid, 2008**

| <b>BOTH SEXES</b> | <b>Medicaid pop, 2008<sup>1</sup></b> | <b>National population, 2008<sup>2</sup></b> | <b>% US pop in Medicaid</b> |
|-------------------|---------------------------------------|----------------------------------------------|-----------------------------|
| <b>UNDER 1</b>    | 2,415,672                             | 4,132,735                                    | 0.58452138838               |
| <b>1 to 5</b>     | 10,149,739                            | 20,162,689                                   | 0.50339213187               |
| <b>6 to 12</b>    | 10,173,223                            | 28,213,850                                   | 0.36057549750               |
| <b>13 to 14</b>   | 2,522,906                             | 8,398,110                                    | 0.30041354543               |
| <b>15 to 18</b>   | 5,296,533                             | 17,785,341                                   | 0.29780328643               |

<sup>1</sup>Table 05 Fiscal Year 2008 Medicaid Eligibles by Age Group, Source: MSIS State Summary FY 2008, Created: 10/28/2011

<sup>2</sup> Intercensal Estimates of the Resident Population by Single Year of Age, Sex, Race, and Hispanic Origin for the United States: April 1, 2000 to July 1, 2010
